# Supplementary material
Source: PubMed Central journal article supplement (PMC10760432)
Supplement: NIHMS1947845-supplement-CDKL5_Developmental_Questionnaire.pdf [file NIHMS1947845-supplement-CDKL5_Developmental_Questionnaire.pdf]

[Skip Logic based on ability]

| CDD Development Questionnaire – Caregiver (CDQ-Caregiver) |          |                |          |              |          |               |          |                      |          | Min # Qs | Max # Qs |
|-----------------------------------------------------------|----------|----------------|----------|--------------|----------|---------------|----------|----------------------|----------|----------|----------|
| 1) Fine Motor                                             |          | 2) Gross Motor |          | 3) Receptive |          | 4) Expressive |          | 5) Social, Cognitive |          |          |          |
| Min # Qs                                                  | Max # Qs | Min # Qs       | Max # Qs | Min # Qs     | Max # Qs | Min # Qs      | Max # Qs | Min # Qs             | Max # Qs |          |          |
| 3                                                         | 16       | 2              | 18       | 1            | 4        | 4             | 20       | 6                    | 8        | 16       | 66       |

[Skip Logic based on age]

| Age      | 6M | 7M | 8M | 9M | 10M | 11M | 12M | 15M | 18M | 24M | 36M | 48M | 60M |
|----------|----|----|----|----|-----|-----|-----|-----|-----|-----|-----|-----|-----|
| Max # Qs | 20 | 23 | 23 | 26 | 26  | 26  | 39  | 43  | 59  | 60  | 62  | 65  | 66  |

| CDD Development Questionnaire - Caregiver (CDQ-Caregiver)                                                                                                                     |                                           |                                      |                       |                                             |
|-------------------------------------------------------------------------------------------------------------------------------------------------------------------------------|-------------------------------------------|--------------------------------------|-----------------------|---------------------------------------------|
| <i>[only for kids older than 6m]</i>                                                                                                                                          |                                           |                                      |                       |                                             |
| Questions                                                                                                                                                                     |                                           |                                      |                       | Answers                                     |
| Child's Name                                                                                                                                                                  |                                           |                                      |                       |                                             |
| Child's DOB                                                                                                                                                                   |                                           |                                      |                       |                                             |
| Date of Survey                                                                                                                                                                |                                           |                                      |                       | <i>[Calculate age]</i>                      |
| Parent's Name                                                                                                                                                                 |                                           |                                      |                       |                                             |
| <u>Part 1: Fine Motor</u>                                                                                                                                                     |                                           |                                      |                       |                                             |
| Please choose which option best describes your child's <b>physical</b> ability, assuming cooperation, to perform the following <b>Fine Motor</b> tasks over the last 30 days: |                                           |                                      |                       |                                             |
| 1, Usually able to do this without help                                                                                                                                       | 2, Sometimes able to do this without help | 3, Can do this but always needs help | 4, Not currently able |                                             |
| 1) If an object is placed in my child's hands, they will hold the object for at least 10 seconds.                                                                             |                                           |                                      |                       |                                             |
| 2) My child is reaching for objects.                                                                                                                                          |                                           |                                      |                       |                                             |
| 3) My child is grabbing objects using his/her whole hand (that is, not using their thumb).                                                                                    |                                           |                                      |                       | <i>[if Q1, Q2 AND Q3 = 4, go to Part 2]</i> |
| 4) My child is grabbing objects using his/her thumb and two or three fingers.                                                                                                 |                                           |                                      |                       |                                             |
| 5) <i>[skip if age &lt;9m]</i> My child is grabbing objects with thumb and index finger.                                                                                      |                                           |                                      |                       |                                             |
| 6) My child holds an object for more than 30 seconds.                                                                                                                         |                                           |                                      |                       |                                             |
| 7) <i>[skip if age &lt;7m]</i> My child switches or transfers a toy from one hand to another.                                                                                 |                                           |                                      |                       |                                             |
| 8) My child explores toy with hands or mouth.                                                                                                                                 |                                           |                                      |                       |                                             |
| 9) <i>[skip if age &lt;9m]</i> My child feeds him/herself finger foods.                                                                                                       |                                           |                                      |                       |                                             |
| 10) <i>[skip if age &lt;12m]</i> My child uses utensils.                                                                                                                      |                                           |                                      |                       |                                             |
| 11) <i>[skip if age &lt;12m]</i> My child uses a single finger to push buttons (e.g. toys, touch screen, elevators).                                                          |                                           |                                      |                       |                                             |
| 12) <i>[skip if age &lt;9m]</i> My child drinks from a sippy cup.                                                                                                             |                                           |                                      |                       |                                             |
| 13) <i>[skip if age &lt;36m]</i> My child drinks from an open cup.                                                                                                            |                                           |                                      |                       |                                             |
| 14) <i>[skip if age &lt;15m]</i> My child scribbles with a crayon.                                                                                                            |                                           |                                      |                       | <i>[if Q14 =4, go to Part 2]</i>            |
| 15) <i>[skip if age &lt;48m]</i> My child tries to draw letters or shapes.                                                                                                    |                                           |                                      |                       |                                             |
| 16) <i>[skip if age &lt;60m]</i> My child writes his/her name.                                                                                                                |                                           |                                      |                       |                                             |

### **Part 2: Gross Motor**

Please choose which option best describes your child's physical ability, assuming cooperation, to perform the following Gross Motor tasks over the last 30 days:

| 1, Usually able to do this without help                     | 2, Sometimes able to do this without help | 3, Can do this but always needs help | 4, Not currently able |                                              |
|-------------------------------------------------------------|-------------------------------------------|--------------------------------------|-----------------------|----------------------------------------------|
| 1) My child is able to move his/her head from side to side. |                                           |                                      |                       |                                              |
| 2) My child holds his/her head up.                          |                                           |                                      |                       |                                              |
| <i>[if age &lt;7m skip to Part 3]</i>                       |                                           |                                      |                       |                                              |
| 3) My child is able to physically stay seated.              |                                           |                                      |                       | <i>[if Q1, Q2, AND Q3 = 4, go to Part 3]</i> |
| 4) My child sits up from lying down.                        |                                           |                                      |                       |                                              |
| <i>[if age &lt;15m skip to Part 3]</i>                      |                                           |                                      |                       |                                              |
| 5) My child stands for 30 seconds or longer.                |                                           |                                      |                       |                                              |
| 6) My child stands up from a chair.                         |                                           |                                      |                       |                                              |
| 7) My child stands up from lying down.                      |                                           |                                      |                       |                                              |
| <i>[if age &lt;18m skip to Part 3]</i>                      |                                           |                                      |                       |                                              |
| 8) My child walks short distances (within the house).       |                                           |                                      |                       | <i>[if Q8 = 4, go to Part 3]</i>             |
| 9) My child walks medium distances (50 feet - 100 yards).   |                                           |                                      |                       |                                              |
| 10) My child walks long distances (100 yards or more).      |                                           |                                      |                       |                                              |
| 11) My child walks up steps, one step at a time.            |                                           |                                      |                       | <i>[if Q11=4, go to Q13]</i>                 |
| 12) My child walks up steps, alternating feet.              |                                           |                                      |                       |                                              |
| 13) My child walks down steps, one step at a time.          |                                           |                                      |                       | <i>[if Q13 = 4, go to Q15]</i>               |
| 14) My child walks down steps, alternating feet.            |                                           |                                      |                       |                                              |
| 15) My child runs.                                          |                                           |                                      |                       |                                              |
| 16) My child rolls a ball.                                  |                                           |                                      |                       |                                              |
| 17) My child throws a ball.                                 |                                           |                                      |                       | <i>[if Q16 AND Q17 = 4, go to Part 3]</i>    |
| 18) <i>[skip if age &lt;48m]</i> My child catches a ball.   |                                           |                                      |                       |                                              |

### **Part 3: Receptive Communication**

Please choose which option best describes your child's ability to perform the following Receptive Communication tasks over the last 30 days:

| 1, Usually able to do                                                       | 2, Often able to do | 3, Sometimes able to do | 4, Not currently able to do |                                                        |
|-----------------------------------------------------------------------------|---------------------|-------------------------|-----------------------------|--------------------------------------------------------|
| 1) My child responds to voice or language.                                  |                     |                         |                             | 1, 2, 3, <i>[Go to Q2]</i><br>4, <i>[Go to Part 4]</i> |
| 2) My child understands what I'm saying.                                    |                     |                         |                             | 1, 2, 3, <i>[Go to Q3]</i><br>4, <i>[Go to Part 4]</i> |
| 3) <i>[skip if age &lt;12m]</i> My child follows simple, one-step commands. |                     |                         |                             | 1, 2, 3, <i>[Go to Q4]</i><br>4, <i>[Go to Part 4]</i> |
| 4) <i>[skip if &lt;24m]</i> My child follows two-step commands.             |                     |                         |                             | All, <i>[Go to Part 4]</i>                             |

### **Part 4: Expressive Communication**

Please choose which option best describes your child's ability to perform the following Verbal Expressive Communication tasks over the last 30 days:

| 1, Usually able to do | 2, Often able to do | 3, Sometimes able to do | 4, Not currently able to do |  |
|-----------------------|---------------------|-------------------------|-----------------------------|--|
|                       |                     |                         |                             |  |

|                                                                                                                                                                                                                                                                                                                                         |                     |                         |                             |                                                                                                                                                                                         |
|-----------------------------------------------------------------------------------------------------------------------------------------------------------------------------------------------------------------------------------------------------------------------------------------------------------------------------------------|---------------------|-------------------------|-----------------------------|-----------------------------------------------------------------------------------------------------------------------------------------------------------------------------------------|
| 1) My child laughs or screams for attention.                                                                                                                                                                                                                                                                                            |                     |                         |                             |                                                                                                                                                                                         |
| 2) My child babbles with vowel sounds.                                                                                                                                                                                                                                                                                                  |                     |                         |                             |                                                                                                                                                                                         |
| 3) My child makes all kinds of sounds including consonants.                                                                                                                                                                                                                                                                             |                     |                         |                             |                                                                                                                                                                                         |
| <i>[if age &lt;18m skip to Non-Verbal Communication]</i>                                                                                                                                                                                                                                                                                |                     |                         |                             |                                                                                                                                                                                         |
| 4) My child uses certain sounds to mean specific things (such as a person, need or object) even though they are not real words.                                                                                                                                                                                                         |                     |                         |                             | 1, 2, 3, <a href="#">[Go to Q5]</a><br>4, <a href="#">[Go to Non-Verbal Communication]</a>                                                                                              |
| 5) My child uses a consistent spoken <u>word</u> to refer to at least one primary caregiver or loved one.                                                                                                                                                                                                                               |                     |                         |                             | 1, 2, 3, <a href="#">[Go to Q5a]</a><br>4, <a href="#">[Go to Q6]</a>                                                                                                                   |
| 5a) My child uses a consistent spoken <u>word</u> to refer to more than one primary care giver or loved one.                                                                                                                                                                                                                            |                     |                         |                             | <a href="#">[Go to Q6]</a>                                                                                                                                                              |
| 6) My child uses a consistent spoken <u>word</u> to refer to at least one object or need (ex: hunger).                                                                                                                                                                                                                                  |                     |                         |                             | 1, 2, 3, <a href="#">[Go to Q6a]</a><br>4, <a href="#">[Go to Q7]</a>                                                                                                                   |
| 6a) My child consistently uses more than one spoken <u>word</u> to refer to different objects or needs.                                                                                                                                                                                                                                 |                     |                         |                             | 1, 2, 3, <a href="#">[Go to Q7]</a><br>4, <a href="#">[if Q5 AND Q6 = 4, Go to Non-Verbal Communication]</a>                                                                            |
| 7) In total, how many words or sounds with a specific meaning, does your child <u>consistently</u> use?<br>1, More than 50 consistent words or sounds<br>2, 11-50 consistent words or sounds<br>3, 6-10 consistent words or sounds<br>4, 1-5 consistent words or sounds<br>5, Not able to consistently use sounds with specific meaning |                     |                         |                             | 1, <a href="#">[Go to Q8]</a><br>2, <a href="#">[Go to Q8]</a><br>3, <a href="#">[Go to Q8]</a><br>4, <a href="#">[Go to Q8]</a><br>5, <a href="#">[Go to Non-Verbal Communication]</a> |
| <i>[if age &lt;24m skip to Non-Verbal Communication]</i>                                                                                                                                                                                                                                                                                |                     |                         |                             |                                                                                                                                                                                         |
| 1, Usually able to do                                                                                                                                                                                                                                                                                                                   | 2, Often able to do | 3, Sometimes able to do | 4, Not currently able to do |                                                                                                                                                                                         |
| 8) My child combines different words into phrases.                                                                                                                                                                                                                                                                                      |                     |                         |                             | 1, 2, 3, <a href="#">[Go to Q8a]</a><br>4, <a href="#">[Go to Non-Verbal Communication]</a>                                                                                             |
| <i>[if age &lt;36m skip to Non-Verbal Communication]</i>                                                                                                                                                                                                                                                                                |                     |                         |                             |                                                                                                                                                                                         |
| 8a) My child speaks in short sentences.                                                                                                                                                                                                                                                                                                 |                     |                         |                             | 1, 2, 3, <a href="#">[Go to Q8b]</a><br>4, <a href="#">[Go to Non-Verbal Communication]</a>                                                                                             |
| <i>[if age &lt;48m skip to Non-Verbal Communication]</i>                                                                                                                                                                                                                                                                                |                     |                         |                             |                                                                                                                                                                                         |
| 8b) My child speaks in long sentences.                                                                                                                                                                                                                                                                                                  |                     |                         |                             | All, <a href="#">[Go to Non-Verbal Communication]</a>                                                                                                                                   |
| Please choose which option best describes your child's ability to perform the following <u>Non-Verbal Communication</u> tasks over the last 30 days.                                                                                                                                                                                    |                     |                         |                             |                                                                                                                                                                                         |
| 1) My child communicates wants and needs through gestures such as head shaking/nodding, pointing (finger or hand), blinking, or eye gaze (not for device control).<br>1, Usually able to do<br>2, Often able to do<br>3, Sometimes able to do<br>4, Not currently able to do                                                            |                     |                         |                             | 1, <a href="#">[Go to Q2]</a><br>2, <a href="#">[Go to Q2]</a><br>3, <a href="#">[Go to Q2]</a><br>4, <a href="#">[Go to Q3]</a>                                                        |
| <i>[If age &lt;12m, skip to Part 5]</i>                                                                                                                                                                                                                                                                                                 |                     |                         |                             |                                                                                                                                                                                         |
| 2) My child uses non-verbal communication or sign language (doesn't have to be an official sign, but same gesture always means the same thing).<br><br>1, My child doesn't need this form of communication because they communicate verbally                                                                                            |                     |                         |                             | 1, <a href="#">[Go to Part 5]</a><br>2, <a href="#">[Go to Q2a]</a><br>3, <a href="#">[Go to Q3]</a>                                                                                    |

|                                                                                                                                                                                                                                                                                                                                                                                                                                                                     |                     |                         |                             |                                                                                                          |
|---------------------------------------------------------------------------------------------------------------------------------------------------------------------------------------------------------------------------------------------------------------------------------------------------------------------------------------------------------------------------------------------------------------------------------------------------------------------|---------------------|-------------------------|-----------------------------|----------------------------------------------------------------------------------------------------------|
| 2, My child is currently able to use non-verbal communication or sign language<br>3, My child is not currently able to use non-verbal communication or sign language                                                                                                                                                                                                                                                                                                |                     |                         |                             |                                                                                                          |
| 1, Usually able to do                                                                                                                                                                                                                                                                                                                                                                                                                                               | 2, Often able to do | 3, Sometimes able to do | 4, Not currently able to do |                                                                                                          |
| 2a) My child uses consistent sign language words (doesn't have to be an official sign, but same gesture always means the same thing)                                                                                                                                                                                                                                                                                                                                |                     |                         |                             | 1, 2, 3, <a href="#">[Go to Q2b]</a><br>4, <a href="#">[Go to Q3]</a>                                    |
| 2b) My child signs in sentences or phrases of 2 or more words.                                                                                                                                                                                                                                                                                                                                                                                                      |                     |                         |                             | All, <a href="#">[Go to Q3]</a>                                                                          |
| 3) My child is able to communicate using an assistive communication device, switches, a picture board, or other tools.<br><br>1, My child doesn't need this form of communication because they communicate verbally<br>2, My child is currently able to use an assistive communication device, switches, a picture board, or other tools.<br>3, My child is not currently able to use an assistive communication device, switches, a picture board, or other tools. |                     |                         |                             | 1, <a href="#">[Go to Part 5]</a><br>2, <a href="#">[Go to Q3a]</a><br>3, <a href="#">[Go to Part 5]</a> |
| 1, Usually able to do                                                                                                                                                                                                                                                                                                                                                                                                                                               | 2, Often able to do | 3, Sometimes able to do | 4, Not currently able to do |                                                                                                          |
| 3a) My child is able to <u>express simple choices between two or three options</u> , using an assistive communication device, switches, a picture board, or other tools.                                                                                                                                                                                                                                                                                            |                     |                         |                             | 1, 2, 3, <a href="#">[Go to Q3b]</a><br>4, <a href="#">[Go to Part 5]</a>                                |
| 3b) My child is able to <u>express complex choices between multiple items</u> using an assistive communication device, switches, a picture board, or other tools.                                                                                                                                                                                                                                                                                                   |                     |                         |                             | 1, 2, 3, <a href="#">[Go to Q3c]</a><br>4, <a href="#">[Go to Part 5]</a>                                |
| 3c) My child is able to <u>combine multiple items to express complex thoughts</u> using an assistive communication device, switches, a picture board, or other tools.                                                                                                                                                                                                                                                                                               |                     |                         |                             | All, <a href="#">[Go to Part 5]</a>                                                                      |

| <b>Part 5: Social/Cognitive</b>                                                                                                                                                                                                                                                                                                                                                                                                                                                                                    |                     |                         |                             |  |
|--------------------------------------------------------------------------------------------------------------------------------------------------------------------------------------------------------------------------------------------------------------------------------------------------------------------------------------------------------------------------------------------------------------------------------------------------------------------------------------------------------------------|---------------------|-------------------------|-----------------------------|--|
| Please choose which option best describes your child's ability to perform the following <u>Social/Cognitive</u> tasks over the last 30 days:                                                                                                                                                                                                                                                                                                                                                                       |                     |                         |                             |  |
| 1, Usually able to do                                                                                                                                                                                                                                                                                                                                                                                                                                                                                              | 2, Often able to do | 3, Sometimes able to do | 4, Not currently able to do |  |
| 1) My child interacts with me.                                                                                                                                                                                                                                                                                                                                                                                                                                                                                     |                     |                         |                             |  |
| 2) My child responds to my voice, touch or presence.                                                                                                                                                                                                                                                                                                                                                                                                                                                               |                     |                         |                             |  |
| 3) My child smiles at me.                                                                                                                                                                                                                                                                                                                                                                                                                                                                                          |                     |                         |                             |  |
| 4) My child laughs at funny things.                                                                                                                                                                                                                                                                                                                                                                                                                                                                                |                     |                         |                             |  |
| 5) My child pushes things away that he/she doesn't want.                                                                                                                                                                                                                                                                                                                                                                                                                                                           |                     |                         |                             |  |
| 6) My child lets me know when he/she doesn't like something.                                                                                                                                                                                                                                                                                                                                                                                                                                                       |                     |                         |                             |  |
| <i><a href="#">[If age &lt;12m, skip to end]</a></i>                                                                                                                                                                                                                                                                                                                                                                                                                                                               |                     |                         |                             |  |
| 7) My child makes a choice between two options (toys, food, activities, music, shows, etc).                                                                                                                                                                                                                                                                                                                                                                                                                        |                     |                         |                             |  |
| 8) In the past 30 days how would you describe your child's play and interaction?<br><br>1, Plays with toy or object or complex games (ex: hide and seek or board games) with others, similar to peers<br>2, Plays with toy or object or simple games (ex: peek-a-boo, hits button or switch to create a reaction), but less than peers<br>3, Interest with a toy or object (ex: holds, manipulates, explores with fingers)<br>4, Holds toy or object but not with purpose of playing with them<br>5, None observed |                     |                         |                             |  |
